# Supplementary material
Source: HighWire-hosted journal article supplement (http://jpet.aspetjournals.org/highwire/filestream/135686/field_highwire_adjunct_files/0/Data_Supplement.pdf)
Supplement: Data_Supplement.pdf [file Data_Supplement.pdf]

## Supplemental Data

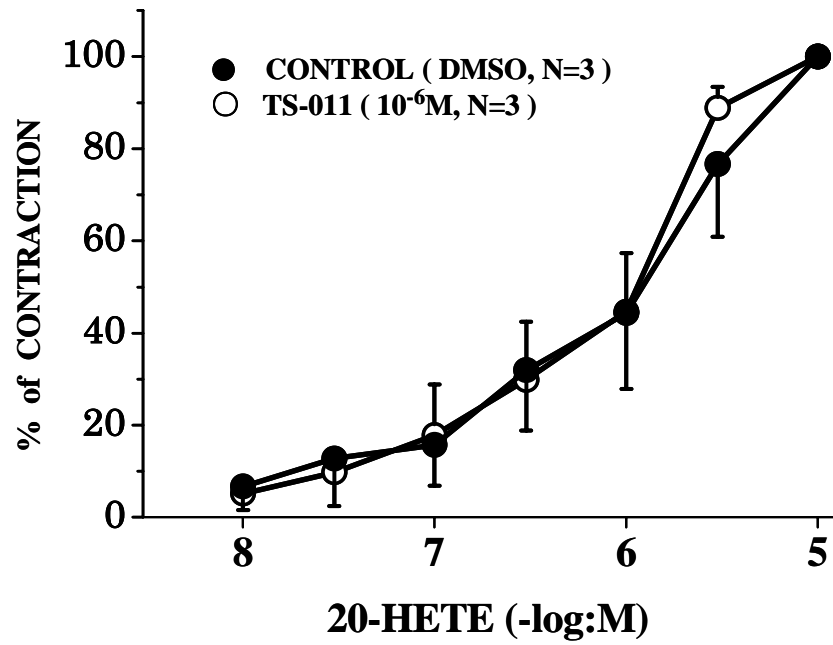

Concentration-response curves for 20-HETE-induced vasoconstriction in isolated canine basilar artery with endothelium in the absence or presence of TS-011 (10<sup>-6</sup>M).
